# Supplementary material for: Transcriptome analysis of gravitational effects on mouse skeletal muscles under microgravity and artificial 1 g onboard environment
Source: PubMed Central journal article supplement (PMC8080648; doi:10.1038/s41598-021-88392-4), 2021-04-28
Supplement: 41598_2021_88392_MOESM1_ESM.pdf [file 41598_2021_88392_MOESM1_ESM.pdf]

## Transcriptome analysis of gravitational effects on mouse skeletal muscles under microgravity and artificial 1 g onboard environment

Risa Okada<sup>1,2</sup>, Shin-ichiro Fujita<sup>3,4</sup>, Riku Suzuki<sup>5,6</sup>, Takuto Hayashi<sup>3,5</sup>, Hirona Tsubouchi<sup>5</sup>, Chihiro Kato<sup>5,7</sup>, **Shunya** Sadaki<sup>5</sup>, Maho Kanai<sup>5,6</sup>, Sayaka Fuseya<sup>3,5</sup>, Yuri Inoue<sup>3,5</sup>, Hyojung Jeon<sup>5</sup>, Michito Hamada<sup>5</sup>, Akihiro Kuno<sup>5,6</sup>, Akiko Ishii<sup>8</sup>, Akira Tamaoka<sup>8</sup>, Jun Tanihata<sup>9</sup>, Naoki Ito<sup>10</sup>, Dai Shiba<sup>1,2</sup>, Masaki Shirakawa<sup>1,2</sup>, Masafumi Muratani<sup>1,4</sup>, Takashi Kudo<sup>1,5\*</sup>, Satoru Takahashi<sup>1,5\*</sup>

<sup>1</sup>Mouse Epigenetics Project, ISS/Kibo experiment, Japan Aerospace Exploration Agency (JAXA), Ibaraki 305-8505, Japan.

<sup>2</sup>JEM Utilization Center, Human Spaceflight Technology Directorate, JAXA, Ibaraki 305-8505, Japan.

<sup>3</sup>Doctoral Program in Biomedical Sciences, Graduate School of Comprehensive Human Sciences, University of Tsukuba, Ibaraki 305-8575, Japan.

<sup>4</sup>Department of Genome Biology, Faculty of Medicine, University of Tsukuba, Ibaraki 305-8575, Japan.

<sup>5</sup>Laboratory Animal Resource Center in Transborder Medical Research Center, and Department of Anatomy and Embryology, Faculty of Medicine, University of Tsukuba, Ibaraki 305-8575, Japan.

<sup>6</sup>Ph.D. Program in Human Biology, School of Integrative and Global Majors, University of Tsukuba, Ibaraki 305-8575, Japan.

<sup>7</sup>Master's Program in Medical Sciences, Graduate School of Comprehensive Human Sciences, University of Tsukuba, Ibaraki 305-8575, Japan.

<sup>8</sup>Department of Neurology, Faculty of Medicine, University of Tsukuba, Ibaraki 305-8575, Japan.

<sup>9</sup>Department of Cell Physiology, The Jikei University School of Medicine, Tokyo, 105-8461, Japan.

<sup>10</sup>Laboratory of Molecular Life Science, Institute of Biomedical Research and Innovation, Foundation for Biomedical Research and Innovation at Kobe (FBRI), Kobe 650-0047, Japan.

\*Corresponding authors: t-kudo@md.tsukuba.ac.jp; satoruta@md.tsukuba.ac.jp.

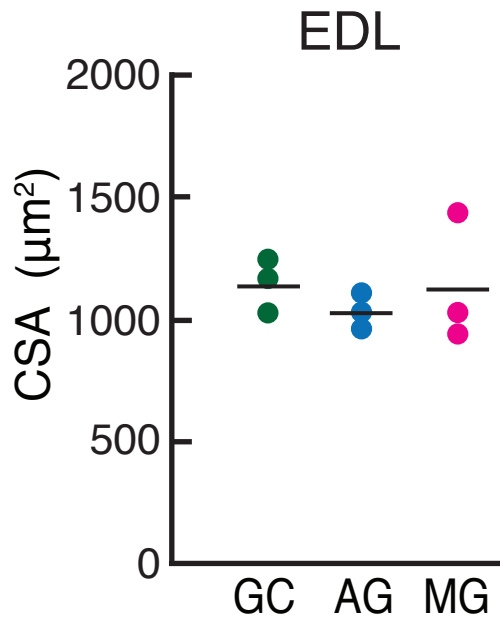

Supplementary Figure 1.

Quantification of cross-sectional areas (CSAs) of EDL muscles in the GC, AG, and MG.

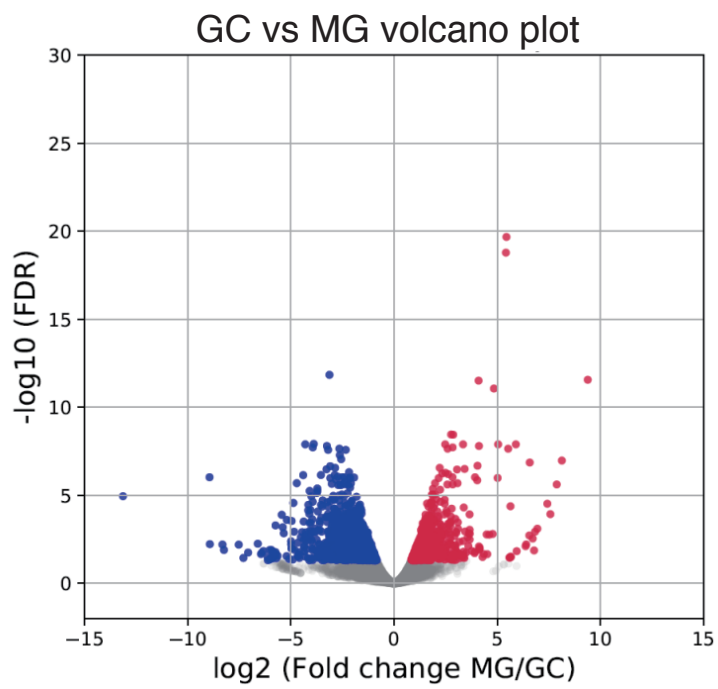

Supplementary Figure 2.

Volcano plots showing differentially regulated genes in the soleus muscle of GC and MG.

**Supplementary Table 1**

Gene lists of differentially expressed genes in the soleus muscle among MG, AG and GC.

**Supplementary Table 2**

Gene lists of differentially expressed atrogenes in the soleus muscle among MG, AG and GC.
